# Supplementary material for: Classifying Medulloblastoma Subgroups Based on Small, Clinically Achievable Gene Sets
Source: Front Oncol. 2021 Jun 10;11:637482. doi: 10.3389/fonc.2021.637482 (PMC8223061; doi:10.3389/fonc.2021.637482)
Supplement: Supplementary file 4 [file DataSheet_4.xlsx]

## Sheet: 22genes
Confusion Matrix and Statistics							Statistics by Class:
	Reference							Group3	Group4	SHH	WNT
Prediction	Group3	Group4	SHH	WNT			Sensitivity	0.9444	0.8511	1	1
Group3	17	6	0	0			Specificity	0.9189	1	0.9747	1
Group4	0	40	0	0			Pos Pred Value	0.7391	1	0.8667	1
SHH	1	1	13	0			Neg Pred Value	0.9855	0.8654	1	1
WNT	0	0	0	14			Prevalence	0.1957	0.5109	0.1413	0.1522
							Detection Rate	0.1848	0.4348	0.1413	0.1522
Overall Statistics							Detection Prevalence	0.25	0.4348	0.163	0.1522
							Balanced Accuracy	0.9317	0.9255	0.9873	1
Accuracy : 0.913
95% CI : (0.8358, 0.9617)
No Information Rate : 0.5109
P-Value [Acc > NIR] : < 2.2e-16
Kappa : 0.8726

## Sheet: 15genes
Confusion Matrix and Statistics							Statistics by Class:
	Reference							Group3	Group4	SHH	WNT
Prediction	Group3	Group4	SHH	WNT			Sensitivity	0.8889	0.8936	1	1
Group3	16	4	0	0			Specificity	0.9459	1	0.962	1
Group4	0	42	0	0			Pos Pred Value	0.8	1	0.8125	1
SHH	2	1	13	0			Neg Pred Value	0.9722	0.9	1	1
WNT	0	0	0	14			Prevalence	0.1957	0.5109	0.1413	0.1522
							Detection Rate	0.1739	0.4565	0.1413	0.1522
Overall Statistics							Detection Prevalence	0.2174	0.4565	0.1739	0.1522
							Balanced Accuracy	0.9174	0.9468	0.981	1
Accuracy : 0.9239
95% CI : (0.8495, 0.9689)
No Information Rate : 0.5109
P-Value [Acc > NIR] : < 2.2e-16
Kappa : 0.8875

## Sheet: 14genes
Confusion Matrix and Statistics							Statistics by Class:
	Reference							Group3	Group4	SHH	WNT
Prediction	Group3	Group4	SHH	WNT			Sensitivity	0.8889	0.9149	1	1
Group3	16	3	0	0			Specificity	0.9595	1	0.962	1
Group4	0	43	0	0			Pos Pred Value	0.8421	1	0.8125	1
SHH	2	1	13	0			Neg Pred Value	0.9726	0.9184	1	1
WNT	0	0	0	14			Prevalence	0.1957	0.5109	0.1413	0.1522
							Detection Rate	0.1739	0.4674	0.1413	0.1522
Overall Statistics							Detection Prevalence	0.2065	0.4674	0.1739	0.1522
							Balanced Accuracy	0.9242	0.9574	0.981	1
Accuracy : 0.9348
95% CI : (0.8634, 0.9757)
No Information Rate : 0.5109
P-Value [Acc > NIR] : < 2.2e-16
Kappa : 0.9031

## Sheet: 12genes
Confusion Matrix and Statistics							Statistics by Class:
	Reference							Group3	Group4	SHH	WNT
Prediction	Group3	Group4	SHH	WNT			Sensitivity	1	0.9362	1	1
Group3	18	3	0	0			Specificity	0.9595	1	1	1
Group4	0	44	0	0			Pos Pred Value	0.8571	1	1	1
SHH	0	0	13	0			Neg Pred Value	1	0.9375	1	1
WNT	0	0	0	14			Prevalence	0.1957	0.5109	0.1413	0.1522
							Detection Rate	0.1957	0.4783	0.1413	0.1522
Overall Statistics							Detection Prevalence	0.2283	0.4783	0.1413	0.1522
							Balanced Accuracy	0.9797	0.9681	1	1
Accuracy : 0.9674
95% CI : (0.9077, 0.9932)
No Information Rate : 0.5109
P-Value [Acc > NIR] : < 2.2e-16
Kappa : 0.9512

## Sheet: 8genes
Confusion Matrix and Statistics							Statistics by Class:
	Reference							Group3	Group4	SHH	WNT
Prediction	Group3	Group4	SHH	WNT			Sensitivity	0.5556	0.9787	1	1
Group3	10	0	0	0			Specificity	1	0.9556	0.9114	1
Group4	2	46	0	0			Pos Pred Value	1	0.9583	0.65	1
SHH	6	1	13	0			Neg Pred Value	0.9024	0.9773	1	1
WNT	0	0	0	14			Prevalence	0.1957	0.5109	0.1413	0.1522
							Detection Rate	0.1087	0.5	0.1413	0.1522
Overall Statistics							Detection Prevalence	0.1087	0.5217	0.2174	0.1522
							Balanced Accuracy	0.7778	0.9671	0.9557	1
Accuracy : 0.9022
95% CI : (0.8224, 0.9543)
No Information Rate : 0.5109
P-Value [Acc > NIR] : 9.642e-16
Kappa : 0.8514

## Sheet: 7genes
Confusion Matrix and Statistics							Statistics by Class:
	Reference							Group3	Group4	SHH	WNT
Prediction	Group3	Group4	SHH	WNT			Sensitivity	0.7222	0.9787	1	1
Group3	13	0	0	0			Specificity	1	0.9778	0.9367	1
Group4	1	46	0	0			Pos Pred Value	1	0.9787	0.7222	1
SHH	4	1	13	0			Neg Pred Value	0.9367	0.9778	1	1
WNT	0	0	0	14			Prevalence	0.1957	0.5109	0.1413	0.1522
							Detection Rate	0.1413	0.5	0.1413	0.1522
Overall Statistics							Detection Prevalence	0.1413	0.5109	0.1957	0.1522
							Balanced Accuracy	0.8611	0.9783	0.9684	1
Accuracy : 0.9348
95% CI : (0.8634, 0.9757)
No Information Rate : 0.5109
P-Value [Acc > NIR] : < 2.2e-16
Kappa : 0.9013

## Sheet: 6genes
Confusion Matrix and Statistics							Statistics by Class:
	Reference							Group3	Group4	SHH	WNT
Prediction	Group3	Group4	SHH	WNT			Sensitivity	0.8333	0.9362	1	1
Group3	15	2	0	0			Specificity	0.973	1	0.9494	1
Group4	0	44	0	0			Pos Pred Value	0.8824	1	0.7647	1
SHH	3	1	13	0			Neg Pred Value	0.96	0.9375	1	1
WNT	0	0	0	14			Prevalence	0.1957	0.5109	0.1413	0.1522
							Detection Rate	0.163	0.4783	0.1413	0.1522
Overall Statistics							Detection Prevalence	0.1848	0.4783	0.1848	0.1522
							Balanced Accuracy	0.9032	0.9681	0.9747	1
Accuracy : 0.9348
95% CI : (0.8634, 0.9757)
No Information Rate : 0.5109
P-Value [Acc > NIR] : < 2.2e-16
Kappa : 0.9027

## Sheet: 5genes
Confusion Matrix and Statistics							Statistics by Class:
	Reference							Group3	Group4	SHH	WNT
Prediction	Group3	Group4	SHH	WNT			Sensitivity	0.8333	0.9362	1	1
Group3	15	2	0	0			Specificity	0.973	1	0.9494	1
Group4	0	44	0	0			Pos Pred Value	0.8824	1	0.7647	1
SHH	3	1	13	0			Neg Pred Value	0.96	0.9375	1	1
WNT	0	0	0	14			Prevalence	0.1957	0.5109	0.1413	0.1522
							Detection Rate	0.163	0.4783	0.1413	0.1522
Overall Statistics							Detection Prevalence	0.1848	0.4783	0.1848	0.1522
							Balanced Accuracy	0.9032	0.9681	0.9747	1
Accuracy : 0.9348
95% CI : (0.8634, 0.9757)
No Information Rate : 0.5109
P-Value [Acc > NIR] : < 2.2e-16
Kappa : 0.9027

## Sheet: 4genes
Confusion Matrix and Statistics							Statistics by Class:
	Reference							Group3	Group4	SHH	WNT
Prediction	Group3	Group4	SHH	WNT			Sensitivity	0.22222	0.9574	1	1
Group3	4	1	0	0			Specificity	0.98649	0.9333	0.8481	1
Group4	3	45	0	0			Pos Pred Value	0.8	0.9375	0.52	1
SHH	11	1	13	0			Neg Pred Value	0.83908	0.9545	1	1
WNT	0	0	0	14			Prevalence	0.19565	0.5109	0.1413	0.1522
							Detection Rate	0.04348	0.4891	0.1413	0.1522
Overall Statistics							Detection Prevalence	0.05435	0.5217	0.2717	0.1522
							Balanced Accuracy	0.60435	0.9454	0.9241	1
Accuracy : 0.8261
95% CI : (0.733, 0.8972)
No Information Rate : 0.5109
P-Value [Acc > NIR] : 2.917e-10
Kappa : 0.737

## Sheet: 3genes
Confusion Matrix and Statistics							Statistics by Class:
	Reference							Group3	Group4	SHH	WNT
Prediction	Group3	Group4	SHH	WNT			Sensitivity	0.16667	0.9574	1	1
Group3	3	1	0	0			Specificity	0.98649	0.9333	0.8608	0.9744
Group4	3	45	0	0			Pos Pred Value	0.75	0.9375	0.5417	0.875
SHH	10	1	13	0			Neg Pred Value	0.82955	0.9545	1	1
WNT	2	0	0	14			Prevalence	0.19565	0.5109	0.1413	0.1522
							Detection Rate	0.03261	0.4891	0.1413	0.1522
Overall Statistics							Detection Prevalence	0.04348	0.5217	0.2609	0.1739
							Balanced Accuracy	0.57658	0.9454	0.9304	0.9872
Accuracy : 0.8152
95% CI : (0.7207, 0.8885)
No Information Rate : 0.5109
P-Value [Acc > NIR] : 1.275e-09
Kappa : 0.7207
